# Supplementary material for: Preparation and characterization of antibacterial paper coated with sodium lignosulfonate stabilized ZnO nanoparticles
Source: Royal Society of Chemistry journal article supplement (doi:10.1039/c5ra21434c), 2016-01-01
Supplement: c5ra21434c1.pdf [file c5ra21434c1.pdf]

## Preparation and characterization of antibacterial paper coated with sodium lignosulfonate stabilized ZnO nanoparticles

Bo Pang<sup>a,d</sup>, Jipeng Yan<sup>b</sup>, Lan Yao<sup>a,d</sup>, Huan Liu<sup>c</sup>, Haisong Wang<sup>\*a,c</sup>, Huizhou Liu<sup>\*a</sup>

<sup>a</sup>CAS Key Laboratory of Bio-based Materials, Qingdao Institute of Bioenergy and Bioprocess Technology, Chinese Academy of Sciences, Qingdao 266101, Shandong, China

<sup>b</sup>Department of Paper and Bioprocess Engineering, SUNY College of Environmental Science and Forestry, 1 Forestry Drive, Syracuse, NY 13210, United States

<sup>c</sup>Liaoning Key Laboratory of Pulp and Papermaking Engineering, Dalian Polytechnic University, Dalian, 116034 Liaoning, China

<sup>d</sup>University of Chinese Academy of Sciences, Beijing 100049, China

\* Corresponding authors: Haisong Wang. Tel: +86 532 80662725. E-mail address:

wanghs@qibebt.ac.cn; Huizhou Liu. Tel: +86 532 80662699. E-mail address: liuhz@qibebt.ac.cn

### Supplementary Information

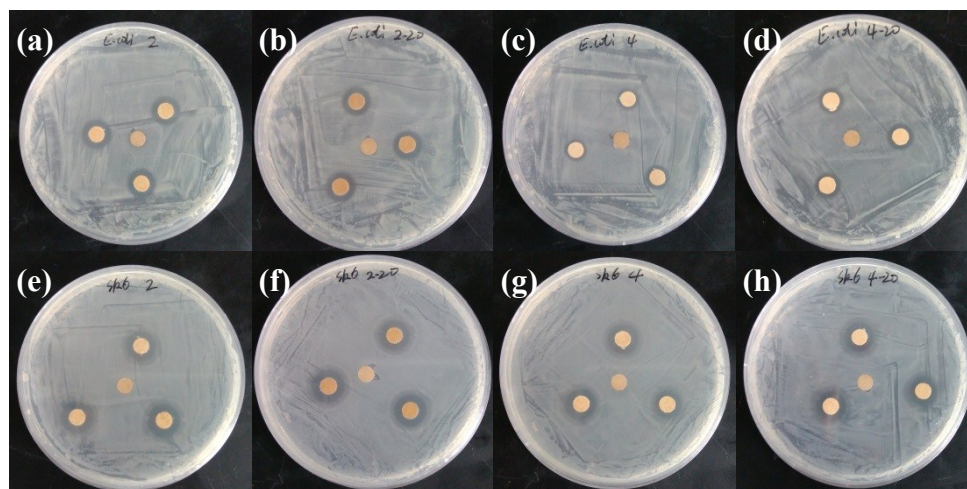

**Supplemental Fig. S1.** Antibacterial effect of ZnO/SLS/CP-2(3), ZnO/SLS/CP-2(20), ZnO/SLS/CP-4(3) ZnO/SLS-4-20 paper samples against *E. coli* (a, b, c, d) and *B. subtilis* (e, f, g, h).
